1 **Full title:** The genetic architecture of the sexually selected sword ornament and its evolution in  
2 hybrid populations

3

4 **Short title:** Genetic basis of the sword ornament

5

6 **Authors:** Daniel L. Powell<sup>1,2,3\*</sup>, Cheyenne Payne<sup>1,2</sup>, Mackenzie Keegan<sup>4</sup>, Shreya M. Banerjee<sup>1,2</sup>,  
7 Rongfeng Cui<sup>5,6</sup>, Peter Andolfatto<sup>7</sup>, Molly Schumer<sup>1,2,8\*+</sup>, Gil G. Rosenthal<sup>2,3+</sup>

8

9 <sup>1</sup>Department of Biology, Stanford University

10 <sup>2</sup>Centro de Investigaciones Científicas de las Huastecas “Aguazarca”, A.C.

11 <sup>3</sup>Department of Biology, Texas A&M University

12 <sup>4</sup>Department of Biology, Northeastern University

13 <sup>5</sup>Max Planck Institute for the Biology of Aging, D-50931, Cologne, Germany

14 <sup>6</sup>School of Ecology, Sun Yat-sen University, Shenzhen, China

15 <sup>7</sup>Department of Biology, Columbia University

16 <sup>8</sup>Hanna H. Gray Fellow, Howard Hughes Medical Institute

17

18 \*Correspondence to: [dpowell8@stanford.edu](mailto:dpowell8@stanford.edu) and [schumer@stanford.edu](mailto:schumer@stanford.edu)

19 +Co-supervised this work

20

21

## 22 **Abstract**

23

24 Biologists since Darwin have been fascinated by the evolution of sexually selected ornaments,  
25 particularly those that reduce viability. Uncovering the genetic architecture of these traits is key  
26 to understanding how they evolve and are maintained. Here, we investigate the genetic  
27 architecture of a sexually selected ornament, the “sword” fin extension that characterizes many  
28 species of swordtail fish (*Xiphophorus*). Using sworded and swordless sister species of  
29 *Xiphophorus*, we generated a mapping population and show that the sword ornament is  
30 polygenic – with ancestry across the genome explaining substantial variation in the trait. After  
31 accounting for the impacts of genome-wide ancestry, we identify one major effect QTL that  
32 explains ~5% of the overall variation in the trait. Using a series of approaches, we narrow this  
33 large QTL interval to a handful of likely candidate genes, including the gene *sp8*. Notably, *sp8*  
34 plays a regulatory role in fin regeneration and harbors several derived substitutions that are  
35 predicted to impact protein function in the species that has lost the sword ornament. Furthermore,  
36 we find evidence of selection on ancestry at *sp8* in four natural hybrid populations, consistent  
37 with selection against the sword in these populations.

38

## 39 **Introduction**

40

41       The diversity generated by sexual selection poses an evolutionary puzzle. Why are  
42 courtship traits so different from one species to the next? Theoretical models suggest that much  
43 of the answer may hinge on the genetic architecture underlying sexual communication [1,2].  
44 With the genomic revolution, we have made massive progress in understanding the genetic  
45 architecture of complex traits, particularly in humans. On the whole, this research has revealed  
46 that many traits, even those formerly assumed to have a simple genetic basis [3], are in fact  
47 highly polygenic, with hundreds to thousands of sites contributing to trait variation [4].

48       By contrast, we know far less about the genetic architecture of adaptive traits like sexual  
49 signals that arise over evolutionary timescales. Previous work has hinted at a simpler genetic  
50 basis for adaptive traits [5–7], including traits under sexual selection [8–10], however it is often  
51 challenging to disentangle variation in genetic architecture from variation in power to map traits  
52 of interest [11]. Moreover, statistical challenges like the winner’s curse [12] make it difficult to  
53 interpret the distribution of effect sizes in such studies.

54       Here, we investigate the genetic architecture and trace the evolutionary history of a well-  
55 studied sexually-selected trait in swordtail fish (*Xiphophorus*). The sword is a male-specific  
56 ornament generated by an elongation of the lower caudal fin rays (Fig 1). The sword ornament  
57 likely evolved in the last 3-5 million years [13,14] as a result of preexisting female mating  
58 preferences for the trait [15,16]. However, contemporary species vary widely in their expression  
59 of the ornament. The length of the sword ranges from complete absence to swords exceeding male  
60 body length (Fig 1; [17]). Female preference for swords also varies across species, from strong  
61 preference to antipathy towards swords [16,18], but is also impacted by social learning [19–21].  
62 How the sword is predicted to evolve in response to female preferences depends in part on its  
63 underlying genetic architecture [2,22].

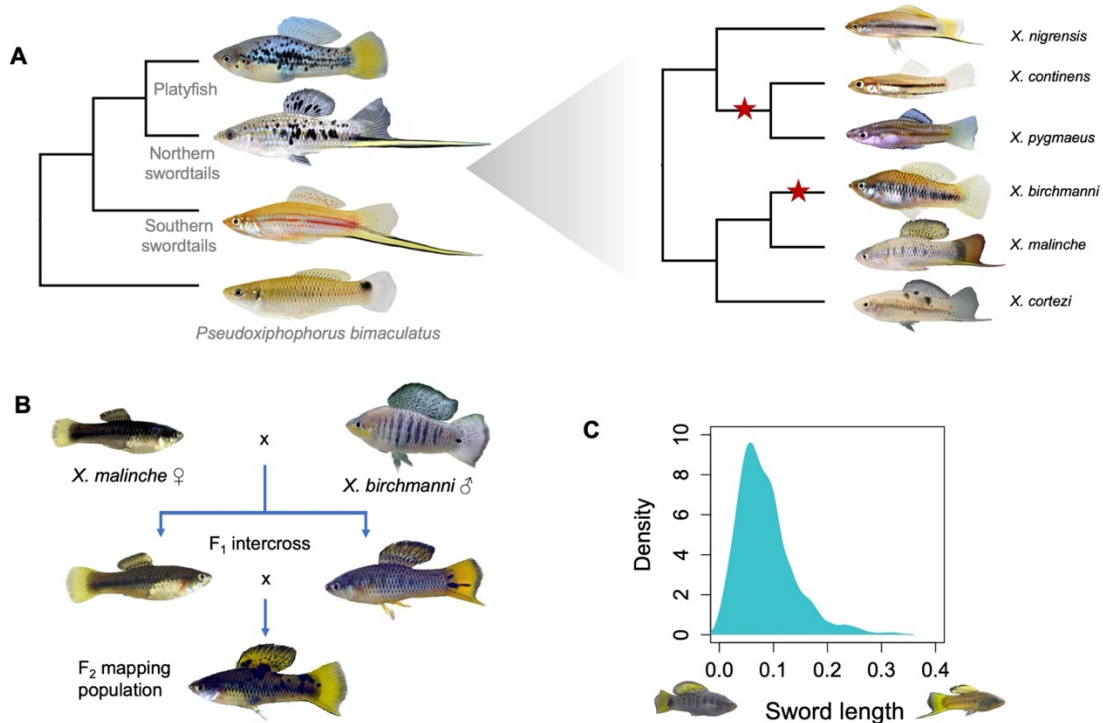

64

65 **Fig 1. Evolutionary history of the sword and study design.** **A.** Left - Phylogenetic  
66 relationships between platyfish, northern swordtails, and southern swordtails. The sword  
67 ornament was lost in the common ancestor of all platyfish. Right - Phylogenetic relationships  
68 among northern swordtails highlights at least two losses of the sword within this clade (red  
69 stars). **B.** Cross design used in this study involved crosses between *X. malinche* females and *X.*  
70 *birchmanni* males, followed by intercrosses between F<sub>1</sub> hybrids. **C.** Distribution of normalized  
71 sword length in individuals within the hybrid mapping population. Photographs on the x-axis  
72 show an example of a hybrid individual with a normalized sword length of zero and an example  
73 of a hybrid individual with a normalized sword length of 0.35.

74

75 The complete loss of the sword in some *Xiphophorus* species affords the opportunity to  
76 characterize the genetic architecture of this sexually selected trait. In *Xiphophorus birchmanni*,  
77 males lack swords and females show strong preference for swordless males [23]. The absence of  
78 the sword in *X. birchmanni* is due to a recent loss of the trait, sometime after it diverged from its  
79 sister lineage, *X. malinche*, approximately 200,000 generations ago (or 100,000 years assuming  
80 two generations per year) [14,24]. In *X. malinche*, males have a pronounced sword ornament, but  
81 females paradoxically appear to prefer *X. birchmanni* visual phenotypes [20].

82

83 Like several pairs of species in the genus, *X. birchmanni* and *X. malinche* naturally  
84 hybridize [25,26]. Natural and artificial hybrid males vary in their sword phenotype, from  
85 swordless to swords as long as those of *X. malinche* (Fig 1). Given the importance of this novel

85 trait in sexual selection theory, we sought to identify regions of the genome associated with the  
86 sword and understand their evolutionary history.

## 87 **Results**

88

### 89 **Estimating the heritability of sword length in hybrids**

90         Due to the fixed differences in sword phenotype between *X. birchmanni* and *X. malinche*  
91 and variable sword length in hybrids (Fig S1; mean sword length to body length ratio *birchmanni*  
92 = 0.016, *malinche* = 0.28), we knew that the sword was heritable. However, we wanted to  
93 quantify how much of the variation in sword length in hybrids could be attributed to genetic  
94 factors when individuals were raised in controlled conditions. To do so, we took advantage of a  
95 quantitative genetics based method for inferring the broad sense heritability of sword length by  
96 comparing phenotypic variance in F<sub>1</sub> hybrids, where all individuals are genetically identical with  
97 respect to ancestry, to phenotypic variance in F<sub>2</sub> hybrids [27] (Fig S1). We note that this  
98 approach assumes that all phenotypic variance in the parental species is due to environmental  
99 effects (see Materials & Methods for more details). This approach resulted in an estimate of 0.48  
100 for broad sense heritability of the sword.

101

### 102 **Mapping the genetic basis of the sword phenotype**

103         Although we have access to naturally occurring hybrids [28], we focused our mapping on  
104 artificial hybrids reared in common conditions (Materials & Methods), given that rearing  
105 condition can affect sword length [29]. We phenotyped 536 adult male F<sub>2</sub> hybrids and collected  
106 low-coverage whole-genome sequence data (~0.2X coverage; Materials & Methods). Using a  
107 pipeline we previously developed [30], we inferred local ancestry of each individual along the 24  
108 swordtail chromosomes (Fig S2). Simulations indicated that we expect this approach to have  
109 high accuracy given our cross design (Fig S3; Supporting Information 1).

110         We thinned our initial dataset of 623,053 ancestry informative sites by physical distance  
111 to retain one marker per 50 kb for mapping. Ancestry linkage disequilibrium in lab-generated  
112 hybrids extends over several megabases. This resulted in 12,794 markers that were  
113 approximately evenly distributed along the genome (95% quantile of inter-marker distance, 60  
114 kb; 98% of markers present in all individuals). Using the scanone function in R/qtl [31], we  
115 recovered one significant QTL for sword length on chromosome 13 (1.5 LOD interval = 4.1  
116 Mb). As expected, individuals that harbored *X. malinche* ancestry in this region of chromosome  
117 13 had longer swords on average, and the effects of the QTL appear to be additive (Fig 2).

118 Bootstrapping and joint analysis with another study allowed us to narrow this large interval to  
119 1.2 Mb ([32]; Supporting Information 2).  
120

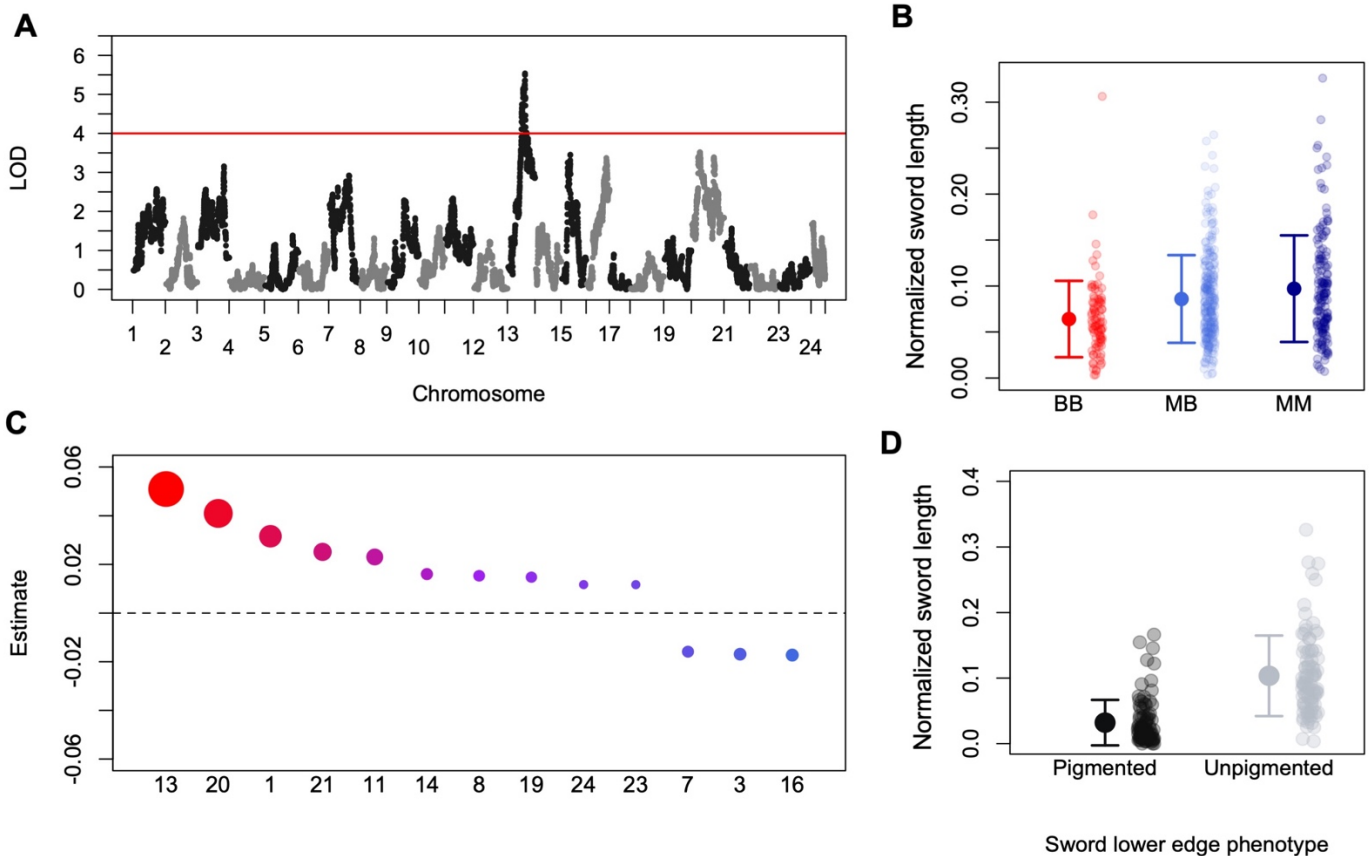

121

122 **Fig 2. Ancestry at chromosome 13 and throughout the genome contributes to sword length.**

123 **A.** Manhattan plot of QTL mapping results for sword length reveal a single genome-wide  
124 significant QTL. Red line indicates genome-wide significant threshold determined by  
125 permutation; LOD – logarithm of odds. **B.** Sword length as a function of ancestry at the QTL  
126 peak. Small semi-transparent points show the raw data and large points and whiskers show the  
127 mean  $\pm$  two standard errors of the mean. BB - homozygous *X. birchmanni*, MB - heterozygous,  
128 MM - homozygous *X. malinche*. **C.** Estimated effect sizes of ancestry on each chromosome  
129 using a model selection approach to select the minimal set of chromosomes that explain sword  
130 length. Point size corresponds to the p-value, with more significant associations represented as  
131 large points. **D.** The sword is a composite phenotype that includes a pigmented edge. Sword  
132 length is not strongly correlated with the presence of the lower edge pigmentation (Fig S4),  
133 suggesting an even more complex genetic basis of the composite trait than indicated by analyses  
134 of sword length alone.

135

136 Estimated effect sizes from QTL mapping studies are often inflated in cases where the

137 experiment has low statistical power [12]. Aware of such issues, we used an approximate

138 Bayesian computation (ABC) approach to estimate the range of effect sizes for the chromosome  
139 13 QTL consistent with our data (Supporting Information 3). Based on this analysis, we estimate  
140 that *X. malinche* ancestry at the QTL peak on chromosome 13 explains 5.5% of the total  
141 variation in sword length (Fig S1; 95% confidence intervals: 1-22%) or approximately 11% of  
142 the heritable variation (Supporting Information 3). We found that the QTL region was syntenic  
143 between *X. birchmanni* and *X. malinche*, with no evidence for inversions, insertions, or deletions  
144 between the species (Fig S5).

145 Despite finding only a single significant genome-wide association with the sword,  
146 multiple lines of evidence indicate that the genetic architecture of the sword is more complex.  
147 Genome-wide ancestry is strongly associated with sword length (Spearman's  $\rho = 0.2$ ,  $p < 4 \times 10^{-6}$ ),  
148 and as expected individuals with a greater proportion of their genome derived from *X. malinche*  
149 tended to have longer swords (Fig S6). This association remains even after accounting for an  
150 individual's ancestry within the QTL region of chromosome 13, indicating that it is not driven by  
151 the contribution of the QTL region to genome-wide ancestry variation (Spearman's  $\rho = 0.18$ ,  
152  $p < 4 \times 10^{-5}$ ; Fig S6).

153 We next asked whether ancestry on particular chromosomes explained more of the  
154 variance in sword phenotype than ancestry on chromosome 13 or genome-wide ancestry  
155 (Materials & Methods). Based on regression analysis, we found that *X. malinche* ancestry on  
156 chromosomes 1, 11, 20 and 21 was significantly associated with variation in sword length, and  
157 together with chromosome 13 explained an estimated 27% of the heritable variation in the trait  
158 (Fig 2). We did not find a significant correlation between chromosome length and estimated  
159 effect size ( $R = -0.09$ ,  $p = 0.66$ ). After accounting for ancestry on chromosomes 1, 11, 13, 20 and  
160 21, *X. malinche* ancestry elsewhere in the genome was no longer significantly predictive of  
161 sword length in a partial correlation analysis. However, an AIC-based model selection approach  
162 retained thirteen chromosomes (54% of the genome) in the final model describing sword length  
163 as a function of chromosome level ancestry (Fig 2). QTL analysis including chromosome-level  
164 ancestry of each of the thirteen chromosomes retained in the AIC model as covariates yielded  
165 similar results (Fig S7). Surprisingly, although *X. malinche* ancestry was positively associated  
166 with sword length in most cases, *X. birchmanni* ancestry on three chromosomes was positively  
167 associated with sword length (Fig 2). Although these results suggest a lower bound for the  
168 number of regions underlying the sword phenotypes, approaches using the inferred effect size of



169 the observed QTL indicate that the true number of causal loci could be much larger ([33];  
170 Supporting Information 3).

171 Moreover, in addition to the genetic architecture of sword length, the sword itself is a  
172 composite trait [34]. The sword phenotype found in natural populations of *Xiphophorus* includes  
173 both the fin extension and a pigmented upper and lower margin (Fig 1, Fig 2). These traits can  
174 become decoupled in hybrids (Fig S4). Although sword length and upper sword edge are  
175 strongly correlated in hybrids ( $R=0.48$ ,  $p<10^{-32}$ ), we detected a weaker correlation between the  
176 presence of the lower sword edge and sword length in hybrids ( $R=0.19$ ,  $p<10^{-5}$ ), even though  
177 both traits are always observed in sworded *X. malinche* (Supporting Information 4). Mapping  
178 attempts for the lower sword edge were unsuccessful. Specifically, no significant QTL peaks  
179 were identified, genome-wide ancestry was not strongly correlated with lower sword edge  
180 presence ( $R=0.05$ ,  $p=0.25$ ), and only ancestry on chromosome 11 was significantly associated  
181 with the lower sword edge (general linear model  $t=2.4$ ,  $p=0.02$ ). These results are discussed in  
182 more detail in Supporting Information 4.

### 183 184 **Functional data is consistent with several candidate genes within the chromosome 13 QTL**

185 The sword normally develops during the course of sexual maturation in *X. malinche* and  
186 hybrid males. To evaluate evidence for possible candidates associated with sword length within  
187 the QTL region, we took advantage of the fact that adult male *X. malinche* will regenerate a  
188 complete sword if the sword tissue is removed (see Materials & Methods, Supporting  
189 Information 5, Fig S8). We also found that the sword will regrow in F<sub>1</sub> hybrids, where all  
190 individuals have short swords (Fig S1, S8), but in *X. birchmanni* we simply observe regrowth of  
191 the normal caudal fin.

192 We reasoned that since the sword phenotype is recovered through the regrowth process  
193 [35,36], genes important in patterning and length should be expressed in the early stages of  
194 regrowth, and may be differentially expressed between *X. birchmanni*, *X. malinche*, and hybrids.  
195 Based on our RNA sequencing dataset (Materials & Methods, Supporting Information 5, Table  
196 S1), a large number of genes were differentially expressed between regenerating tissue in *X.*  
197 *birchmanni* and *X. malinche* (Fig 3; Fig S9). These differentially expressed genes were enriched  
198 for pathways including cell adhesion, cell cycle pathways, extracellular matrix-receptor  
199 interactions, and ribosome biogenesis (Materials & Methods, Supporting Information 3, 5). The

200 first three pathways encompass a substantial number of genes with significant expression  
 201 differences (Materials & Methods, Supporting Information 5). Many of the expression  
 202 differences we observe during regeneration appear to be consistent with evolved changes in  
 203 expression (i.e. allele-specific expression, Supporting Information 5).  
 204

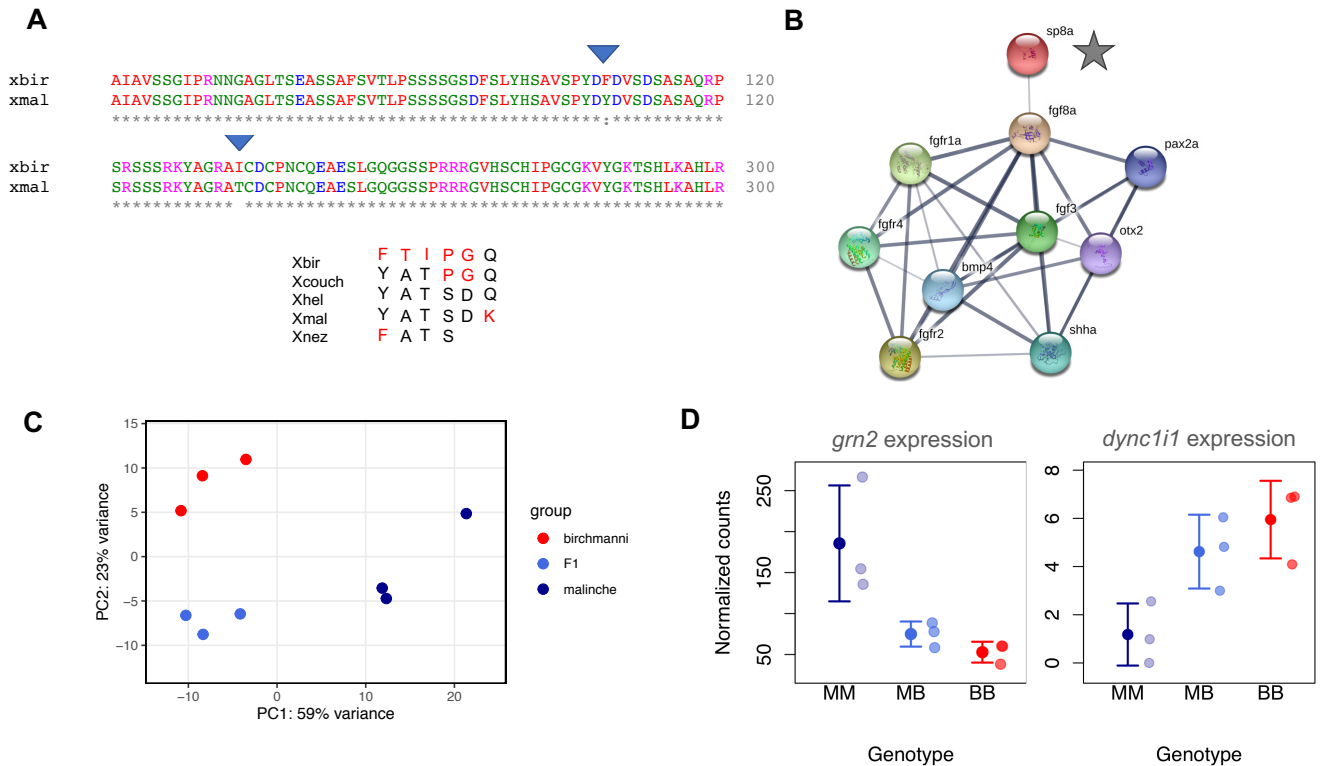

205  
 206 **Fig 3. Expression and substitution data highlight candidate genes likely to drive variation**  
 207 **in sword length.** **A.** Clustal alignment of a section of the *X. birchmanni* and *X. malinche* *sp8*,  
 208 which is found within the chromosome 13 QTL peak. Derived substitutions in *X. birchmanni* that  
 209 are predicted to not be tolerated in a SIFT analysis are indicated by the blue triangles. Asterisks  
 210 indicate identical amino acid sequences, colors indicate amino acid properties, blanks, colons  
 211 and periods indicate substitutions. Below the alignment is a table of amino acid state at all sites  
 212 that are variable in at least one of the species analyzed. Black indicates amino acids that follow  
 213 the inferred ancestral state and red indicate amino acids that are derived. **B.** STRING network for  
 214 the ortholog of *Xiphophorus sp8* in zebrafish (*sp8a*) shows that this gene regulates a number of  
 215 fibroblast growth factor and fibroblast growth factor receptor genes (*fgf* and *fgfr* genes). These  
 216 genes have been implicated in fin growth in zebrafish [37], limb development in other species  
 217 [38], and were previously identified as likely candidates underlying sword regeneration in  
 218 southern swordtails [35]. **C.** Principal component analysis of RNAseq data from regenerating  
 219 caudal fin tissue, which will become sword tissue in *X. malinche* and F<sub>1</sub>s. **D.** Expression patterns  
 220 of two candidate genes within the QTL region that are differentially expressed between *X.*

221 *birchmanni* and *X. malinche* in the regenerating sword and show expression patterns consistent  
222 with predicted phenotypes (Table S3), although we observe low overall expression for *dync1il*.  
223 BB - *X. birchmanni*, MB - F<sub>1</sub> hybrids, MM - *X. malinche*. Small semi-transparent points show  
224 the raw data and solid points and whiskers show the mean  $\pm$  two standard errors of the mean.  
225 Note that *sp8* is expressed but not significantly differentially expressed between species in  
226 regenerating caudal tissue (Fig S10).

227

228 Although there is evidence from ancestry and expression data that the production of the  
229 sword involves genetic differences on many chromosomes and substantial differences in  
230 expression response between species, we were interested in narrowing down likely candidates  
231 associated with sword length within the QTL region of chromosome 13. Of 52 genes in this  
232 region (Table S2), 16 had annotations associated with growth, skeletal, muscle, or limb  
233 development phenotypes. We further evaluated these candidates using a combination of  
234 differential expression and sequence analysis approaches (Supporting Information 3, 5),  
235 ultimately narrowing to eight genes most likely to drive variation in sword length due to their  
236 expression or substitution patterns (Table S3, Fig 3).

237 Of these genes, we highlight three of the most compelling candidates. *sp8*, which impacts  
238 limb and fin differentiation [37,38], has five derived nonsynonymous substitutions in *X.*  
239 *birchmanni* (Fig 3) and an overall rapid rate of protein evolution between *X. birchmanni* and *X.*  
240 *malinche* ( $dN/dS = 0.78$ ; upper 3% genome-wide) [32]. Although *sp8* harbors a large number of  
241 substitutions derived in *X. birchmanni* (Fig 3), we did not find strong evidence for a different  
242 substitution rate along the *X. birchmanni* branch based on PAML analysis ( $\chi^2=3$ ,  $p=0.08$ ).  
243 However, two of the substitutions derived in *X. birchmanni* are predicted to affect protein  
244 function based on analysis with the program SIFT (Fig 3, Materials & Methods, [39]). We also  
245 evaluated these metrics for the other candidate genes in the region with amino acid substitutions  
246 between *X. birchmanni* and *X. malinche* (Table S4).

247 Two other genes, *dync1il* and *grn2*, are differentially expressed in regenerating caudal  
248 tissue, and their expression patterns mirror predicted phenotypic differences between *X.*  
249 *birchmanni* and *X. malinche* (Fig 3). Misexpression of *dync1il*, which is downregulated in  
250 regenerating sword tissue in *X. malinche*, is associated with abnormal limb and fin growth in  
251 other species ([40]; Fig 3). *grn2* is strongly upregulated in regenerating *X. malinche* fin tissue  
252 (Fig 3) and belongs to a family of progranulin growth factors which are implicated in regulating  
253 cell growth, proliferation, and regeneration [41].

254

## 255 **Sword QTL in hybrid populations**

256           Given the importance of the sword as a sexually selected signal, we predicted that regions  
257 underlying variation in this phenotype may have unusual patterns of ancestry in natural hybrid  
258 populations formed between *X. birchmanni* and *X. malinche*. Behavioral research has indicated  
259 that in addition to males having lost the sword phenotype, female *X. birchmanni* prefer swordless  
260 males [23]. Although *X. malinche* males are sworded, females of this species appear indifferent  
261 to the sword and generally prefer *X. birchmanni* visual phenotypes [20,42]. Thus, we may expect  
262 that genomic regions underlying the sword would be selected against in hybrid populations, if  
263 swordless males, on average, have a mating advantage over sworded males.

264           We examined local ancestry around the chromosome 13 QTL in four hybrid populations  
265 using a combination of previously collected data and new data [24,43]. Two of these populations  
266 (Acuapa and Aguazarca) derive the majority of their genomes from the *X. birchmanni* parental  
267 species and two populations (Tlatemaco and Chahuaco falls) derive the majority of their  
268 genomes from the *X. malinche* parental species. Newly collected data for the Acuapa population  
269 is available through the NCBI sequence read archive (SRAXXXXXX, pending).

270           Overall, *X. birchmanni* x *X. malinche* hybrid populations do not show unusual ancestry in  
271 the chromosome 13 sword QTL region as a whole (Fig S11). However, given the size of the  
272 QTL, there is substantial heterogeneity in ancestry within the QTL region in natural hybrid  
273 populations where ancestry linkage disequilibrium decays over ~1 Mb [24,43]. Interestingly, *X.*  
274 *malinche* ancestry is lower than expected across four independent hybrid populations around the  
275 gene *sp8* and those closely linked to it ( $p=0.002$  by simulation, Materials & Methods, Table S4).  
276 This is notable because *sp8* was identified as a promising candidate within the chromosome 13  
277 QTL region based on its phenotypic effects on fin and limb growth and the presence of amino  
278 acid substitutions likely to impact protein function between *X. birchmanni* and *X. malinche* (Fig  
279 3; Table S3; Supporting Information 3). If *sp8* is indeed the causal locus within the QTL region,  
280 low *X. malinche* ancestry could be consistent with selection against the sword in hybrid  
281 populations.

282           We combined local ancestry analyses in population samples with another source of data  
283 that could also highlight selection in this region. For one of the hybrid populations studied above  
284 (Acuapa) we were able to develop a time-transect dataset, spanning an estimated 24 generations  
285 of hybrid population evolution (from 2006 to 2018). Although we do not see evidence for

286 unusual changes in ancestry in the QTL region as a whole, we observe a decline in *X. malinche*  
 287 ancestry over time within the Acuapa population at *sp8* (Fig 4), consistent with moderate  
 288 selection against *X. malinche* ancestry in this region (maximum a posteriori estimate: -0.1, 95%  
 289 confidence intervals: -0.44 to -0.03; Fig 4; Supporting Information 6). This direction of change  
 290 in ancestry is opposite what would be expected due to population demography, given that the  
 291 Acuapa population receives *X. malinche* but not *X. birchmanni* migrants ([28]; see Supporting  
 292 Information 6). Other candidate genes in this region do not change significantly in ancestry over  
 293 this time period, apart from genes with the strongest physical linkage to *sp8* (*sp4*, 11 kb away  
 294 and *twistnb*, 60 kb away; Table S5).  
 295

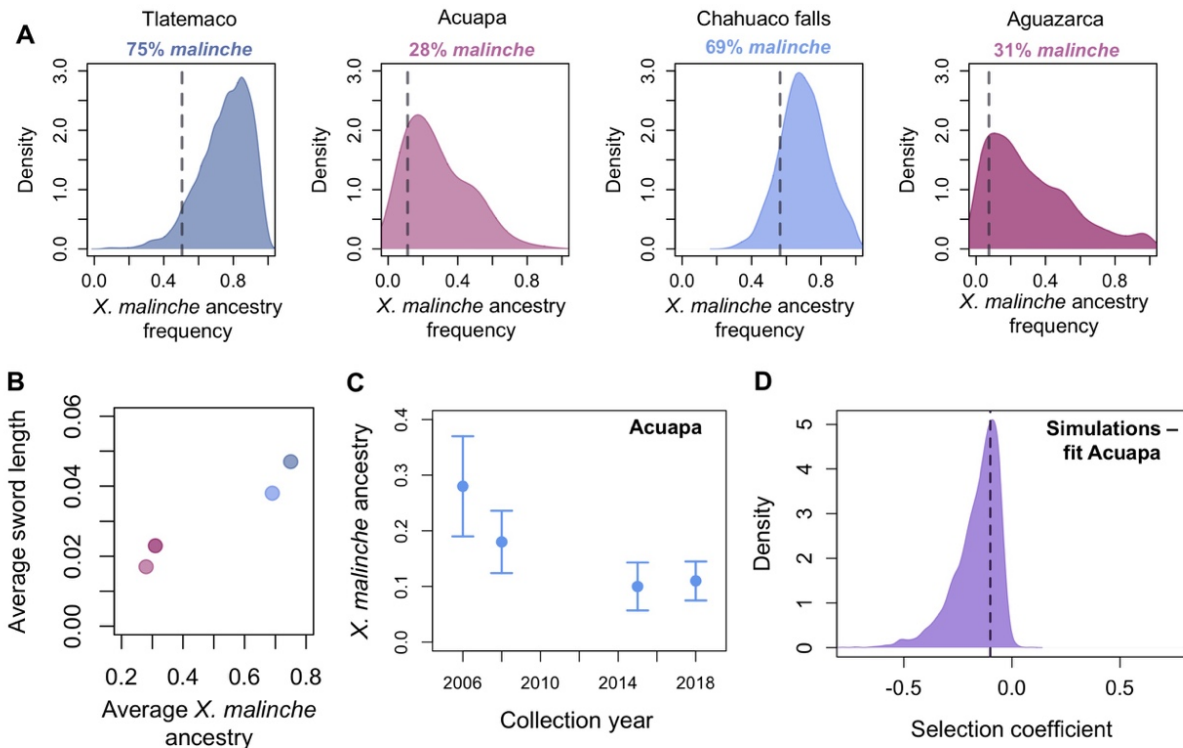

296

297 **Fig 4. Patterns of ancestry at *sp8* are consistent with selection against *X. malinche* ancestry.**  
 298 **A.** Genome wide ancestry distribution in naturally occurring hybrid populations versus ancestry  
 299 at *sp8* (dotted line). Across hybrid populations, ancestry at *sp8* falls in the lower tail of the *X.*  
 300 *malinche* ancestry distribution. Ancestry is summarized genome wide and at *sp8* in 50 kb  
 301 windows. **B.** Overall, observed sword length correlates with genome-wide ancestry across hybrid  
 302 populations (Pearson's  $R=0.98$ ,  $p=0.03$ ). Plotted phenotypes are based on 48-193 individuals per  
 303 population. We caution that this analysis does not control for potential differences in  
 304 environmental effects across populations. **C.** *X. malinche* ancestry decreases over time at *sp8* in a  
 305 hybrid population where time series data is available (the Acuapa population). **D.** This decrease  
 306 is consistent with moderate to strong selection against *X. malinche* ancestry at the *sp8* region in

307 this population. Shown here is the posterior distribution of accepted parameters from ABC  
308 simulations (Supporting Information 6). Dashed line shows the maximum a posteriori estimate.

309

### 310 **Evolutionary patterns associated with the sword QTL**

311 The distribution of the sword trait among *Xiphophorus* species indicates that there have  
312 been multiple losses of the trait [13,14]. Most species lacking a sword fall within the platyfish  
313 clade, representing an ancient loss of the trait (Fig 1). By contrast, the loss of the sword in *X.*  
314 *birchmanni* occurred since its divergence with *X. malinche*, an estimated 200,000 generations  
315 ago [24].

316 Given the distinct timescales and independence of these losses, we were surprised to find  
317 that a sword QTL on chromosome 13 is also identified using crosses between the southern  
318 swordtail species *X. hellerii* and the platyfish species *X. maculatus*, largely overlapping with our  
319 signal (Supporting Information 2). Because of extensive hybridization in the group, this led us to  
320 ask whether there was evidence of introgression of genes associated with the absence of the  
321 sword.

322 The ranges of *X. birchmanni* and *X. birchmanni* x *X. malinche* hybrids overlap with a  
323 single platyfish species, *X. variatus* [17,25]. Like other platyfish, *X. variatus* lacks the sword. We  
324 recently detected evidence of introgression from the lineage leading to *X. variatus* into *X.*  
325 *birchmanni* and *X. malinche* [24]. We asked whether *X. birchmanni* harbored platyfish derived  
326 ancestry tracts that coincided with the chromosome 13 sword QTL, and were not found in *X.*  
327 *malinche*. We used the program PhyloNet-HMM to identify such regions [44]. Based on  
328 simulations, we predict that this approach will have good power to detect fixed ancestry tracts,  
329 likely due to the large sequence divergence between the groups (Supporting Information 7).  
330 Notably, we do not detect any such tracts in the QTL peak near *sp8* or unusual phylogenetic  
331 relationships in this region (Fig S12). We confirmed this result with an F<sub>4</sub> ratio-based approach  
332 which may be more robust to short ancestry tracts ([45], Supporting Information 7).

333 Together, this implies that introgression from *X. variatus* at the chromosome 13 QTL is  
334 not responsible for the loss of the sword in *X. birchmanni*. We caution, however, that we have  
335 not excluded a role for introgression at other, as of yet unknown regions, as a cause of recent  
336 sword loss in the *X. birchmanni* lineage.

337

## 338 Discussion

339

340 Using a combination of approaches, we identified a major effect locus contributing to  
341 phenotypic variation in the length of the sword, a sexually selected trait that evolved in the  
342 common ancestor of *Xiphophorus* fish. First highlighted by Darwin, this trait has long served as  
343 a classic example in sexual selection theory of the role of female preferences in driving the  
344 evolution of male ornamentation [46]. Among eight plausible candidates in this region (Table  
345 S3), we highlight *sp8*, which is expressed in regenerating swords and is surprisingly divergent in  
346 sequence between *X. birchmanni* and *X. malinche* (Fig 3, Fig S10). In vertebrates, knockouts of  
347 *sp8* have truncated limb phenotypes [38,47,48]. Moreover, *sp8* regulates members of the  
348 fibroblast growth factor (*fgf*) signaling pathway ([38]; Fig 3), which has previously been  
349 implicated in fin growth in general [37,49] and sword growth in particular [35].

350 In addition to chromosome 13, we find that ancestry throughout the rest of the genome  
351 contributes to variation in sword length. Model selection suggests that sword length is explained  
352 by ancestry proportions on as many as 13 of 24 chromosomes (Fig 2). This includes the putative  
353 sex chromosome, although the estimated effect size is small (<1% of the variation explained; Fig  
354 2). Moreover, during sword regrowth a suite of genes are differentially regulated (Fig 3) and  
355 some of this response is likely attributable to evolved expression differences between species  
356 (Supporting Information 5). Further, sword length is just one of several traits contributing to the  
357 composite sword ornament, including melanocyte pigmentation of the sword edge, and these  
358 traits can become decoupled in hybrids (Fig 1; Supporting Information 4). Together, these results  
359 highlight the complex genetic architecture of the sword phenotype.

360 Surprisingly, we also observe that *X. birchmanni* ancestry on several chromosomes is  
361 positively correlated with sword length. This result is puzzling since *X. birchmanni* males lack a  
362 sword and thus *X. birchmanni* ancestry should not contribute to longer swords in hybrids.  
363 Simulations suggest that these results are not expected to be an artifact of our analysis approach  
364 (Supporting Information 8). Instead we speculate that they could be explained by the predictions  
365 of Fisher's geometric model [50,51], where different phenotypic optima in the two species (i.e.  
366 sworded and swordless males) result in fixation of different suites of genetic variants, whose  
367 combinatorial effects are uncovered in hybrids [52]. These observations highlight a general  
368 problem for QTL mapping approaches using interspecific hybrids, where the phenotypic

369 variance observed in hybrids is not necessarily generated by the same set of loci responsible for  
370 trait differences between the parental populations. Indeed, given the frequency of transgressive  
371 traits in hybrids, such effects may be relatively common [26,53].

372 Our results here also serve to underscore an important finding from previous work that  
373 has been largely overlooked in the recent mapping literature [54]. Without accounting for  
374 variation in genome-wide ancestry in hybrids, we originally detected three genome-wide  
375 significant QTLs (Fig S13, Supporting Information 8). Examination of two of these associations,  
376 on chromosomes 1 and 20, revealed relatively flat peaks spanning most of the chromosome (Fig  
377 S13). After accounting for genome-wide ancestry, both signals fell below our genome-wide  
378 significance threshold (Fig 2, Fig S13, Supporting Information 8). Our simulations suggest that  
379 when traits are polygenic and there is realistic variation in ancestry among artificial hybrids,  
380 ignoring genome-wide ancestry can result in inflated QTL peaks (Supporting Information 8).  
381 This phenomenon was explored in earlier theoretical work from Visscher & Haley [54]. The  
382 underlying biological issue is that although individuals generated by artificial crosses have a  
383 certain proportion of their genome derived from each parental species (i.e. 50% in our study, Fig  
384 S14), substantial variation in genome-wide ancestry is generated by recombination. The  
385 technical issues that arise from this variance are analogous to those long-appreciated in the  
386 admixture mapping literature [55]. Here, we emphasize again this important issue and how  
387 overlooking it can potentially lead to misinterpretation of mapping results.

388 The loss of the sword in *X. birchmanni* is one of several losses in the genus (Fig 1) and  
389 there is an overall trend towards preference for reduced sword length in the genus as a whole  
390 [14,56]. Given the history of gene flow in *Xiphophorus*, even between distantly related species,  
391 we asked whether there was evidence of gene flow into *X. birchmanni* at the chromosome 13  
392 QTL from a swordless species. Our results indicated that introgression from swordless species on  
393 chromosome 13 is unlikely to explain the loss of the sword (Fig S12; Supporting Information 7).  
394 We note again, however, that given the polygenic basis of the sword we cannot exclude a role of  
395 introgression in sword loss at other regions of the genome.

396 Results from natural populations suggest that there may be selection against the sword in  
397 hybrid zones formed between *X. birchmanni* and *X. malinche*. Female *X. birchmanni* prefer  
398 swordless males and female *X. malinche* appear to be indifferent to the sword [20,23]. Moreover,  
399 natural selection is expected to act in concert against sworded males, as they are more visually



400 obvious to potential predators [57]. This leads to the expectation that there may be selection  
401 against *X. malinche* ancestry in regions associated with the sword. Interestingly, one of the  
402 candidate genes we identified, *sp8*, has lower than expected *X. malinche* ancestry across hybrid  
403 populations and decreases in *X. malinche* ancestry over time in one hybrid population (Fig 4;  
404 Table S5; Supporting Information 6). This decrease is consistent with moderate selection against  
405 *X. malinche* ancestry in this region (Fig 4). However, we caution that ancestry at the  
406 chromosome 13 QTL explains only a fraction of the overall trait variation; ancestry changes at  
407 other underlying loci may support different patterns of selection and trait evolution in hybrid  
408 populations.

409         The causes of variability in sexual ornamentation within and between species remains a  
410 source of controversy. Theory and empirical evidence suggest a modest role for so-called “good  
411 genes” selection, where ornaments predict offspring success [58]. By contrast, ornaments can  
412 rapidly evolve simply because they are attractive, if they exploit a preexisting bias or coevolve  
413 with female preferences [59,60]. While the predictions of the good genes model are not strongly  
414 dependent on genetic architecture, the dynamics of coevolutionary models depend critically on  
415 the underlying genetic architecture [60]. For example, theory predicts that only traits with a  
416 polygenic basis are likely to be driven to extreme exaggeration through so-called “runaway”  
417 sexual selection [1,2,22]. To date, however, most genetic studies of sexual ornaments have  
418 identified single loci of large effect on sex chromosomes [8–10].

419         Our results support a polygenic, largely autosomal, architecture underlying variation in  
420 the sword ornament, with contributions from ancestry on thirteen chromosomes. This polygenic  
421 genetic basis is consistent with a number of evolutionary mechanisms that have been proposed to  
422 explain the evolution of extraordinary diversity in sword phenotypes across *Xiphophorus*. Our  
423 findings contrast with some previous observations that identified a simpler genetic architecture  
424 for several sexually selected ornaments [8–10], highlighting the challenges ahead in  
425 understanding the genetic basis of many evolutionarily important traits.

## 426 **Materials & Methods**

427

### 428 **Artificial crosses between *X. birchmanni* and *X. malinche***

429 We crossed *X. malinche* (female) x *X. birchmanni* (male) to produce an F<sub>1</sub> generation;  
430 previous attempts to produce viable offspring from the reciprocal cross were largely  
431 unsuccessful. We reared virgin *X. malinche* (n = 24) born to females collected at the Chicayotla  
432 locality on the Río Xontla using baited minnow traps. Wild *X. birchmanni* sires (n = 10) were  
433 collected from the Coacuilco locality on the Río Coacuilco. The resulting F<sub>1</sub> offspring from this  
434 cross were reared to maturity. Based on past experience, we knew that it would be difficult to  
435 generate large numbers of early-generation hybrids in the lab. As a result, in June of 2016 we  
436 seeded each of 29 mesocosm tanks with F<sub>1</sub> hybrids (n = 21 per tank). These mesocosm tanks are  
437 2000 L outdoor tanks kept in semi-natural conditions but protected from predators and fed once  
438 daily.

439 We sampled the mesocosms in January and May of both 2017 and 2018, at which time all  
440 adult males were anesthetized with tricaine methanesulfonate (Texas A&M IACUC protocol  
441 #2016-0190), marked individually with color-coded elastomer tags for future identification  
442 (Northwest Marine Technologies), photographed for phenotyping, and fin-clipped for  
443 genotyping before returning them to mesocosm tanks. In total we genotyped and phenotyped 536  
444 adult early generation hybrid males. Analysis of crossover numbers indicate that the majority of  
445 these individuals are F<sub>2</sub> hybrids, and we found that our results are robust to excluding likely later  
446 generation hybrids (Supporting Information 9).

447

### 448 **Phenotyping approaches**

449 We measured standard length (distance from the tip of the mandible to the midpoint of the distal  
450 edge of the caudal peduncle), sword extension (distance from the edge of the caudal fin to the tip  
451 of the sword) [61] from photographs of adult males using the ImageJ software package [62]. For  
452 analysis, sword extension was standardized by dividing by standard length and is referred to as  
453 sword length throughout the manuscript. We note that sword length is usually referred to the  
454 distance from the caudal fin base to the sword tip, which differs from our terminology here for  
455 convenience.

456

457 **Low coverage whole genome sequencing**

458 We used the Agencourt bead-based protocol (Beckman Coulter, Brea, California) to  
459 extract DNA from fin clips. We followed the manufacturer's instructions for the extractions  
460 except that we used half reactions. DNA was diluted to 10 ng/ $\mu$ l and 5  $\mu$ l of sample was mixed  
461 with Tn5 transposase enzyme pre-charged with adapters. This mixture was incubated at 55 °C for  
462 7 minutes to enzymatically shear DNA and the reaction was stopped by adding 2.5  $\mu$ l of 0.2%  
463 SDS and incubating at 55 °C for another 7 minutes. Three microliters of each sample were  
464 combined with a plate-level i5 index and one of 96 i7 indices in an individual PCR reaction  
465 using OneTaq HS Quick Load mastermix. After amplification, 5  $\mu$ l of each library were pooled  
466 and the pool was purified using Agencourt AMPpure XP purification beads. Libraries were  
467 quantified using a Qubit fluorimeter (Thermo Scientific, Wilmington, DE). Libraries were  
468 evaluated for size distribution and quality using a Bioanalyzer 1000 (Agilent, Santa Clara,  
469 California). Libraries were sequenced on the Illumina HiSeq 4000 at Weill Cornell Medical  
470 Center across three lanes to collect paired-end 100 nucleotide reads. This data has been deposited  
471 on the NCBI sequence read archive (SRAXXXXXX, pending).

472

473 **Local ancestry inference**

474 To infer local ancestry, we used a pipeline we previously developed called *ancestryinfer*  
475 [30,63]. Briefly, for each individual Illumina reads were mapped to both the *X. birchmanni* and  
476 *X. malinche* reference genomes; uniquely mapping reads were retained and counts for each allele  
477 were tabulated at each ancestry informative site. A hidden Markov model [63] was applied to  
478 these counts to generate posterior probabilities of each ancestry state (homozygous *birchmanni*,  
479 heterozygous, and homozygous *malinche*) at ancestry informative sites throughout the genome.  
480 This resulted in posterior probabilities at 623,053 sites genome-wide in our dataset.

481 For downstream analyses, we converted these posterior probabilities to hard calls. If an  
482 individual had a posterior probability greater than 0.9 for any ancestry state, they were assigned  
483 that ancestry state at the focal marker. On average artificial hybrids derived 50% of their  
484 genomes from each parental species, as expected from the cross design (Fig S14). Local ancestry  
485 also mirrored expected patterns for early generation hybrids (Fig S2). Simulation results suggest  
486 we expect to have high accuracy in local ancestry inference (Fig S3).

487

## 488 **Estimates of heritability**

489 To estimate the broad sense heritability of the sword length trait, we took advantage of  
490 phenotypic data from F<sub>1</sub> and F<sub>2</sub> hybrids raised in common conditions [64]. We calculated the  
491 variance in normalized sword length contributed by environmental factors (V<sub>E</sub>) as the trait  
492 variance in F<sub>1</sub> hybrids, where all individuals have identical ancestry states throughout the  
493 genome. We calculated the combined impacts of environment and genetic variance (V<sub>G</sub>) using  
494 phenotypic variance (V<sub>P</sub>) in F<sub>2</sub> hybrids. This allowed us to solve for V<sub>G</sub> and estimate broad sense  
495 heritability using the relationship  $h^2_{\text{broad}} = V_G / V_P$  (see [64]).

496 We note that the approach that we use to estimate heritability was designed for inbred  
497 lines and assumes that phenotypic variation within the parental species is due to environmental  
498 variation. While this is likely a valid assumption for *X. birchmanni* (mean sword length  
499 normalized by body length = 0.016 ± 0.02), it may not be the case in *X. malinche* where we  
500 observe greater variation in sword length (mean sword length normalized by body length = 0.28  
501 ± 0.07). Thus, we evaluated possible impacts of genetic variation for sword length within *X.*  
502 *malinche* on heritability inference using simulations (Supporting Information 10). These  
503 simulations suggest that additional genetic variation for sword length within *X. malinche* is  
504 unlikely to strongly bias our estimates of the heritability driven by *X. malinche* ancestry  
505 (Supporting Information 10, Fig S15).

506

## 507 **QTL analysis**

508 For QTL analysis, the data were thinned to retain one marker per 50 kb; this resulted in  
509 12,794 markers spread approximately evenly across the genome (95% of intermarker distances  
510 were less than 60 kb). This thinning is necessary due to the computational intensity of analysis  
511 using the R/qtl software. We used the scanone function of R/qtl to perform single QTL model  
512 standard interval mapping using the EM algorithm [31]. Recombination fraction was estimated  
513 using the est.rf() function and markers missing genotype data were excluded using the  
514 drop.nullmarker() function. Since genome-wide hybrid index was significantly correlated with  
515 sword length ( $\rho = 0.20$ ,  $p < 4 \times 10^{-6}$ ) we included it as a covariate during mapping (see also Fig  
516 S13; Supporting Information 8). We also repeated mapping analysis including ancestry on each  
517 chromosome retained in AIC model selection as a covariate (Fig S7). Rearing tank and tank  
518 location were omitted as covariates because they did not affect phenotype distribution. The

519 threshold for genome-wide logarithm of odds (LOD) at a false discovery rate of 5% was  
520 determined based on 1,000 permutations of sword phenotype onto observed genotypes. For the  
521 identified QTL, the region that fell within 1.5 LOD of the peak LOD value was treated as the  
522 associated interval for downstream analyses.

523 For each chromosome containing a significant QTL, we aligned that chromosome from  
524 the *X. birchmanni* and *X. malinche* assemblies [43] using the program MUMmer [65]. We found  
525 no evidence of structural rearrangements or deletions between the two species in this region (Fig  
526 S5).

527

### 528 **Genetic architecture of the sword**

529 In addition to QTL mapping, we asked about genome-wide associations between sword  
530 length and ancestry. We summarized ancestry per chromosome and genome-wide and used a  
531 partial correlation approach with the ppcor method in R to identify chromosomes in which  
532 ancestry was significantly associated with sword length, after accounting for ancestry on  
533 chromosome 13. We adjusted p-values with a bonferroni correction for the number of  
534 chromosomes. Finally, we evaluated associations between ancestry and sword length using an  
535 AIC model selection approach. We input a model in which ancestry on all chromosomes was  
536 included as independent variables and used the *step* function in R to select the minimal model of  
537 sword length as a function of chromosome level ancestry.

538 We also evaluated whether features such as chromosome length, number of genes per  
539 chromosome, and number of differentially expressed genes per chromosome correlated with the  
540 estimated effect sizes of the 24 chromosomes (see also Supporting Information 5). We did not  
541 see a correlation between the number of annotated genes per chromosome and the estimated  
542 effect size of that chromosome, whether we included all chromosomes (Spearman's  $\rho = 0.1$ ,  $p =$   
543  $0.6$ ) or only those retained during model selection (Spearman's  $\rho=0.57$ ,  $p = 0.1$ ), although the  
544 trend observed for the latter is suggestive.

545

### 546 **Sword regeneration experiments**

547 In order to compare gene expression patterns in developing caudal tissue of *X.*  
548 *birchmanni*, *X. malinche*, and their F<sub>1</sub> hybrids, we took tissue samples after ten days of  
549 regeneration from three pools of ten individual males for each genotype class (90 fish in total)

550 following Offen et al. [35]. Samples had to be pooled due to the expectation of low RNA yield  
551 from individual samples [Manfred Scharl, personal communication]. Briefly, to begin the  
552 experiment we anesthetized each fish in MS-222 and amputated the distal 1/4 of the caudal fin,  
553 which includes the sword in *X. malinche* and F<sub>1</sub> hybrids, using a sterile razorblade. After  
554 recovery from anesthesia, each fish was housed individually in 11-liter aquaria and fins were  
555 allowed to regenerate for ten days at 22°C. After ten days, each fish was once again anesthetized  
556 and the regenerating blastema was removed. The dissected tissue was divided into three sections,  
557 with the most ventral section corresponding to regenerated sword tissue in *X. malinche* and F<sub>1</sub>  
558 hybrids. The ventral tissue sections were then pooled in groups of ten according to genotype and  
559 replicate for RNA extraction. We generated a total of three pools (30 males) for each biological  
560 condition: *X. birchmanni*, *X. malinche* and F<sub>1</sub> hybrids. RNA was extracted from the pooled tissue  
561 using a Trizol based protocol followed by on-column DNase treatment and purification using  
562 the Qiagen RNeasy Mini Kit (Qiagen, Valencia, CA). RNAseq libraries were prepared in a  
563 single batch by the Bauer Core at Harvard using the KAPA mRNA HyperPrep Kit (Roche, Palo  
564 Alto, CA) with 300-500 nanograms of input RNA. Samples were sequenced across two HiSeq  
565 2000 lanes at Harvard's Bauer Core (Table S6) and yielded 150bp paired-end reads.

566

### 567 **Differential expression analysis**

568 We tested for differential expression between *X. birchmanni* and *X. malinche* in the  
569 libraries described above. We used the Cutadapt and FastQC wrapper tool Trim Galore! to trim  
570 reads with low quality bases (Phred score < 30) and Illumina adapter sequences [66]. We used  
571 kallisto [67] to pseudoalign reads to the *X. birchmanni* reference transcriptome and imported raw  
572 counts for differential gene expression analysis into the R package DESeq2 [68]. Briefly, we  
573 created a DESeqDataSet object using the tximport package, setting *X. birchmanni* as the  
574 reference group. We performed log-fold change shrinkage using an adaptive shrinkage estimator  
575 with a fitted mixture of normal distributions as a prior, derived from the 'ashr' package [69].  
576 Counts were normalized to plot expression profiles using DESeq's internal normalization, which  
577 calculates a normalization factor per sample using a median of ratios method. Genes with zero  
578 counts, extreme outliers (using a Cook's distance cutoff of 0.99), or a low mean normalized  
579 counts were removed from analysis. To check for potential bias in the pseudoalignment step, we

580 also pseudoaligned trimmed reads against the *X. malinche* reference transcriptome, repeated all  
581 analyses, and obtained qualitatively identical results (Supporting Information 5).

582

### 583 **Allele-specific expression analysis**

584 We used a modified version of the program WASP [70] to test for evidence for allele-  
585 specific expression of genes differentially expressed between *X. birchmanni* and *X. malinche* in  
586 the regenerating caudal tissue of F<sub>1</sub> hybrids (<https://github.com/TheFraserLab/Hornet>). WASP  
587 corrects for mapping biases that can impact analyses of allele-specific expression by identifying  
588 reads that overlap SNPs and removing reads that show evidence of mapping biases. This resulted  
589 in counts for the *X. birchmanni* and *X. malinche* alleles at each ancestry informative SNP in F<sub>1</sub>  
590 hybrids. DESeq2 [68] was used to analyze this count data. Counts were imported into a DESeq  
591 object as a matrix with the design ~ individual + allele. All size factors were set to one to avoid  
592 size factor normalization, and the model was fit with parametric dispersion.

593

### 594 **Pathway and functional category enrichment analysis in regenerating sword tissue**

595 We investigated evidence for functional enrichment among differentially expressed genes  
596 using Gene Ontology and KEGG pathway analysis. For KEGG pathway enrichment, we used *X.*  
597 *birchmanni* vs *X. malinche* regenerating fin log fold changes calculated for DESeq2 differential  
598 expression analysis. Gene IDs were mapped to Entrez IDs from the *X. maculatus* Ensembl  
599 database (version 99) and KEGG pathway gene sets were generated with the `kegg.gsets` function  
600 from *X. maculatus* KEGG IDs. Both databases were downloaded between 30 March 2020 and 2  
601 April 2020. Enriched gene sets were inferred with the R package `gage` [71] for both single and  
602 dual directionality (Table S8). For GO enrichment, we used BioMart to extract *X. maculatus*  
603 Ensembl IDs and generated a gene universe using all genes included in *X. birchmanni* vs *X.*  
604 *malinche* day 10 regeneration DESeq2 analysis. We used a hypergeometric test (`hyperGTest` in  
605 R) to obtain a set of overrepresented GO biological pathway terms in the significantly  
606 differentially expressed (FDR adjusted p-value < 0.1) gene set (Table S9).

607

### 608 **Substitution and tolerance predictions at candidate sword genes within the QTL region**

609 For each of the candidates in the associated sword QTL region (Table S3), we generated  
610 predicted cDNA alignments based on the *X. birchmanni* and *X. malinche* genomes and available

611 genome sequences for other species [72–74] and quantified rates of amino acid evolution using  
612 PAML [75]. Using the known phylogenetic relationships between species [14] we identified  
613 derived substitutions in these genes, with a focus on derived substitutions in *X. birchmanni*. We  
614 similarly used PAML to test for evidence of differences in evolutionary rates on the branch  
615 leading to *X. birchmanni*.

616 We also compared individual substitutions in *X. birchmanni* and *X. malinche* sequences  
617 in detail using SIFT [39]. Using the *X. malinche*, *X. cortezi*, *X. montezumae*, *X. nezahualcoyotl*,  
618 and *X. hellerii* (outgroup) sequences, we identified derived amino acid changes in *X. birchmanni*.  
619 We then extracted all protein sequences for bony fish from NCBI’s protein database and aligned  
620 them with clustal omega [76]. We evaluated this alignment with SIFT and asked whether derived  
621 substitutions in *X. birchmanni* were predicted to change protein function.

622

### 623 **Ancestry near the chromosome 13 QTL in natural hybrid populations**

624 To ask whether patterns of *X. malinche* ancestry in natural hybrid populations were  
625 unusual in our QTL as a whole and at candidate genes inside the QTL region, we generated joint  
626 null distributions for each population. For each hybrid population for which we had previously  
627 inferred local ancestry [24,28,43], we generated summaries of average ancestry in 1 Mb and 50  
628 kb windows across the 24 swordtail chromosomes. Next, we generated expected null  
629 distributions for ancestry across the four focal populations. We randomly drew a window from  
630 each population and recorded the ancestry. For each population, we determined whether the  
631 randomly drawn value had equivalent or lower *X. malinche* ancestry than observed in the focal  
632 QTL region for that population. We repeated this procedure 5,000 times and asked how  
633 frequently randomly drawn ancestry from all four populations was equal to or lower than true *X.*  
634 *malinche* ancestry.

635

### 636 **Phylogenetic approaches**

637 For phylogenetic analyses, we needed sequences from each species of interest aligned to  
638 the same coordinate system (Table S7). To generate these sequences, we mapped reads from  
639 each species to the *X. birchmanni* reference genome [43] using *bwa* [77]. Next, we removed  
640 duplicates with picard tools, realigned indels, called variants using GATK [78], and filtered  
641 variants as previously described [24]. We used these variant sites to generate alignments of



642 phylogenetically informative sites for each species on chromosome 13

643 ([https://github.com/Schumerlab/Lab\\_shared\\_scripts](https://github.com/Schumerlab/Lab_shared_scripts)).

644 For each gene of interest within the QTL peak, we extracted the alignment, which  
645 included both exons and introns, and ran the program RAxML [79] with 100 rapid bootstraps.  
646 Following this step, we used RAxML to infer maximum likelihood phylogenies for these regions  
647 using the General Reversible Time substitution model. We examined the output for evidence of  
648 regions with unusual topologies that received high bootstrap support, which may indicate the  
649 presence of incomplete lineage sorting (ILS) or gene flow.

650 We were also interested in inferring phylogenetic evidence for gene flow between *X.*  
651 *variatus* and *X. birchmanni* and *X. malinche* using this dataset. We used the program PhyloNet-  
652 HMM [44] which uses pre-defined hybridization topologies and gene trees to infer local ancestry  
653 in the presence of ILS. Past work has shown this approach to have a relatively low false-  
654 switching rate in the presence of ILS [74] and our simulations suggest we should have high  
655 power to identify introgressed regions (Supporting Information 7). Specifically, we evaluated  
656 whether there were regions within the QTL interval on chromosome 13 that supported gene flow  
657 from *X. variatus* into *X. birchmanni* but not from *X. variatus* into *X. malinche*, using a posterior  
658 probability threshold of 0.9.

659

660 **Acknowledgements**

661

662 We thank Jeremy Berg, Jenn Coughlan, Mark Kirkpatrick, Hakhamanesh Mostafavi, Molly  
663 Przeworski, Yuval Simons, Mike Ryan, Andrew Taverner, and members of the Rosenthal and  
664 Schumer labs for helpful discussion and/or feedback on earlier versions of this work. We thank  
665 the federal government of Mexico for permission to collect fish. Stanford University and the  
666 Stanford Research Computing Center provided computational support for this project. This work  
667 was supported by NSF LTREB 1354172 to G. G. Rosenthal and a Hanna H. Gray fellowship and  
668 NIH 1R35GM133774 grant to M. Schumer.

669

## 670 **References**

671

- 672 1. Kirkpatrick M, Hall DW. Sexual selection and sex linkage. *Evolution*. 2004;58(4):683–91.
- 673 2. Mead LS, Arnold SJ. Quantitative genetic models of sexual selection. *Trends Ecol Evol*  
674 (Amst). 2004 May;19(5):264–71.
- 675 3. Morgan MD, Pairo-Castineira E, Rawlik K, Canela-Xandri O, Rees J, Sims D, et al.  
676 Genome-wide study of hair colour in UK Biobank explains most of the SNP heritability.  
677 *Nat Commun*. 2018 Dec 10;9(1):1–10.
- 678 4. Wood AR, Esko T, Yang J, Vedantam S, Pers TH, Gustafsson S, et al. Defining the role of  
679 common variation in the genomic and biological architecture of adult human height. *Nat*  
680 *Genet*. 2014 Nov;46(11):1173–86.
- 681 5. Kunte K, Zhang W, Tenger-Trolander A, Palmer DH, Martin A, Reed RD, et al. doublesex  
682 is a mimicry supergene. *Nature*. 2014 Mar;507(7491):229–32.
- 683 6. Jones FC, Grabherr MG, Chan YF, Russell P, Mauceli E, Johnson J, et al. The genomic  
684 basis of adaptive evolution in threespine sticklebacks. *Nature*. 2012 Apr;484(7392):55–61.
- 685 7. Linnen CR, Poh Y-P, Peterson BK, Barrett RDH, Larson JG, Jensen JD, et al. Adaptive  
686 evolution of multiple traits through multiple mutations at a single gene. *Science*. 2013 Mar  
687 15;339(6125):1312–6.
- 688 8. Lamichhaney S, Fan G, Widemo F, Gunnarsson U, Thalmann DS, Hoepfner MP, et al.  
689 Structural genomic changes underlie alternative reproductive strategies in the ruff  
690 (*Philomachus pugnax*). *Nat Genet*. 2016 Jan;48(1):84–8.
- 691 9. Lampert KP, Schmidt C, Fischer P, Volff J-N, Hoffmann C, Muck J, et al. Determination of  
692 onset of sexual maturation and mating behavior by melanocortin receptor 4 polymorphisms.  
693 *Curr Biol*. 2010 Oct 12;20(19):1729–34.
- 694 10. Kim K-W, Jackson BC, Zhang H, Toews DPL, Taylor SA, Greig EI, et al. Genetics and  
695 evidence for balancing selection of a sex-linked colour polymorphism in a songbird. *Nat*  
696 *Comm*. 2019 Apr 23;10(1):1852.
- 697 11. Rockman MV. The Qtn program and the alleles that matter for evolution: all that's gold  
698 does not glitter. *Evolution*. 2012;66(1):1–17.
- 699 12. Xu S. Theoretical basis of the Beavis Effect. *Genetics*. 2003 Dec 1;165(4):2259–68.
- 700 13. Jones JC, Fan S, Franchini P, Scharl M, Meyer A. The evolutionary history of  
701 *Xiphophorus* fish and their sexually selected sword: a genome-wide approach using  
702 restriction site-associated DNA sequencing. *Mol Ecol*. 2013;22(11):2986–3001.

- 703 14. Cui R, Schumer M, Kruesi K, Walter R, Andolfatto P, Rosenthal G. Phylogenomics reveals  
704 extensive reticulate evolution in Xiphophorus fishes. *Evolution*. 2013;67(8):2166–2179.
- 705 15. Basolo AL. A further examination of preexisting bias favoring a sword in the genus  
706 Xiphophorus. *Anim Behav*. 1995;50:365–75.
- 707 16. Basolo AL. Female preference predates the evolution of the sword in swordtail fish.  
708 *Science*. 1990;250(4982):808–10.
- 709 17. Rauchenberger M, Kallman KD, Morizot DC. Monophyly and geography of the Rio  
710 Panuco Basin Mexico swordtails genus Xiphophorus with descriptions of four new species.  
711 *Am Mus Novit*. 1990;(2975).
- 712 18. Basolo AL. Female preference for male sword length in the green swordtail, Xiphophorus  
713 helleri (Pisces: Poeciliidae). *Anim Behav*. 1990;40(2):332–8.
- 714 19. Delclos PJ, Forero SA, Rosenthal GG. Divergent neurogenomic responses shape social  
715 learning of both personality and mate preference. *J Exp Biol*. 2020;223(6).
- 716 20. Cui R, Delclos PJ, Schumer M, Rosenthal GG. Early social learning triggers neurogenomic  
717 expression changes in a swordtail fish. *Proc Biol Sci*. 2017 May 17;284(1854).
- 718 21. Verzijden MN, Culumber ZW, Rosenthal GG. Opposite effects of learning cause  
719 asymmetric mate preferences in hybridizing species. *Behav Ecol*. 2012 Sep 1;23(5):1133–9.
- 720 22. Lande R. Models of speciation by sexual selection on polygenic traits. *PNAS*. 1981 Jun  
721 1;78(6):3721–5.
- 722 23. Wong BBM, Rosenthal GG. Female disdain for swords in a swordtail fish. *Am Nat*.  
723 2006;167(1).
- 724 24. Schumer M, Xu C, Powell DL, Durvasula A, Skov L, Holland C, et al. Natural selection  
725 interacts with recombination to shape the evolution of hybrid genomes. *Science*. 2018 May  
726 11;360(6389):656.
- 727 25. Culumber ZW, Fisher HS, Tobler M, Mateos M, Barber PH, Sorenson MD, et al.  
728 Replicated hybrid zones of Xiphophorus swordtails along an elevational gradient. *Mol*  
729 *Ecol*. 2011;20(2):342–56.
- 730 26. Rosenthal GG, de la Rosa Reyna XF, Kazianis S, Stephens MJ, Morizot DC, Ryan MJ, et  
731 al. Dissolution of sexual signal complexes in a hybrid zone between the swordtails  
732 Xiphophorus birchmanni and Xiphophorus malinche (Poeciliidae). *Copeia*.  
733 2003;2003(2):299–307.
- 734 27. Falconer DS, Mackay TFC. *Introduction to quantitative genetics*. 4th ed. Harlow: Addison  
735 Wesley Longman; 1996.

- 736 28. Schumer M, Powell DL, Delclós PJ, Squire M, Cui R, Andolfatto P, et al. Assortative  
737 mating and persistent reproductive isolation in hybrids. *Proc Natl Acad Sci USA*. 2017 Oct  
738 10;114(41):10936.
- 739 29. Basolo A. Shift in investment between sexually selected traits: tarnishing of the silver  
740 spoon. *Anim Behav*. 1998 Mar;55(3):665–71.
- 741 30. Schumer M, Powell DL, Corbett-Detig R. Versatile simulations of admixture and accurate  
742 local ancestry inference with mixnmatch and ancestryinfer. *bioRxiv*. 2019 Nov 30;860924.
- 743 31. Broman KW, Wu H, Sen Ś, Churchill GA. R/qtl: QTL mapping in experimental crosses.  
744 *Bioinformatics*. 2003 May 1;19(7):889–90.
- 745 32. Schartl M, Kneitz S, Ormanns J, Schmidt C, Anderson JL, Amores A, et al. The  
746 developmental and genetic architecture of the sexually selected male ornament of  
747 swordtails. *bioRxiv*. 2020.
- 748 33. Otto SP, Jones CD. Detecting the undetected: estimating the total number of loci underlying  
749 a quantitative trait. *Genetics*. 2000 Dec 1;156(4):2093–107.
- 750 34. Basolo AL, Trainor BC. The conformation of a female preference for a composite male trait  
751 in green swordtails. *Anim Behav*. 2002 Mar 1;63(3):469–74.
- 752 35. Offen N, Blum N, Meyer A, Begemann G. Fgfr1 signalling in the development of a  
753 sexually selected trait in vertebrates, the sword of swordtail fish. *BMC Devel Biol*. 2008;8.
- 754 36. Offen N, Meyer A, Begemann G. Identification of novel genes involved in the development  
755 of the sword and gonopodium in swordtail fish. *Devel Dyn*. 2009;238(7):1674–87.
- 756 37. Shibata E, Yokota Y, Horita N, Kudo A, Abe G, Kawakami K, et al. Fgf signalling controls  
757 diverse aspects of fin regeneration. *Development*. 2016 Aug 15;143(16):2920–9.
- 758 38. Kawakami Y, Esteban CR, Matsui T, Rodríguez-León J, Kato S, Belmonte JCI. Sp8 and  
759 Sp9, two closely related buttonhead-like transcription factors, regulate Fgf8 expression and  
760 limb outgrowth in vertebrate embryos. *Development*. 2004 Oct 1;131(19):4763–74.
- 761 39. Vaser R, Adusumalli S, Leng SN, Sikic M, Ng PC. SIFT missense predictions for genomes.  
762 *Nat Protoc*. 2016 Jan;11(1):1–9.
- 763 40. Völler D, Reinders J, Meister G, Bosserhoff A-K. Strong reduction of AGO2 expression in  
764 melanoma and cellular consequences. *Br J Cancer*. 2013 Dec 10;109(12):3116–24.
- 765 41. Li Y-H, Chen H-Y, Li Y-W, Wu S-Y, Wangta-Liu, Lin G-H, et al. Progranulin regulates  
766 zebrafish muscle growth and regeneration through maintaining the pool of myogenic  
767 progenitor cells. *Sci Rep*. 2013 Jan 31;3(1):1–8.
- 768 42. Tayebi N, Jamsheer A, Flöttmann R, Sowinska-Seidler A, Doelken SC, Oehl-Jaschkowitz  
769 B, et al. Deletions of exons with regulatory activity at the DYNC1H1 locus are associated

- 770 with split-hand/split-foot malformation: array CGH screening of 134 unrelated families.  
771 Orphanet J Rare Dis. 2014 Jul 29;9:108.
- 772 43. Powell DL, García-Olazábal M, Keegan M, Reilly P, Du K, Díaz-Loyo AP, et al. Natural  
773 hybridization reveals incompatible alleles that cause melanoma in swordtail fish. *Science*.  
774 2020 May 15;368(6492):731–6.
- 775 44. Liu KJ, Dai J, Truong K, Song Y, Kohn MH, Nakhleh L. An HMM-based comparative  
776 genomic framework for detecting introgression in eukaryotes. *PLOS Comput Biol*. 2014  
777 Jun 12;10(6):e1003649.
- 778 45. Patterson N, Moorjani P, Luo Y, Mallick S, Rohland N, Zhan Y, et al. Ancient admixture in  
779 human history. *Genetics*. 2012 Nov 1;192(3):1065–93.
- 780 46. Darwin C. *the descent of man, and selection in relation to sex*. D. Appleton; 1871. 508 p.
- 781 47. Treichel D, Schöck F, Jäckle H, Gruss P, Mansouri A. mBtd is required to maintain  
782 signaling during murine limb development. *Genes Dev*. 2003 Nov 1;17(21):2630–5.
- 783 48. Bell SM, Schreiner CM, Waclaw RR, Campbell K, Potter SS, Scott WJ. Sp8 is crucial for  
784 limb outgrowth and neuropore closure. *PNAS*. 2003 Oct 14;100(21):12195–200.
- 785 49. Draper BW, Stock DW, Kimmel CB. Zebrafish fgf24 functions with fgf8 to promote  
786 posterior mesodermal development. *Development*. 2003 Oct;130(19):4639–54.
- 787 50. Orr HA. The population genetics of adaptation: the distribution of factors fixed during  
788 adaptive evolution. *Evolution*. 1998;52(4):935–49.
- 789 51. Fisher RA. *The genetical theory of natural selection*. Рипол Классик; 289 p.
- 790 52. Simon A, Bierne N, Welch JJ. Coadapted genomes and selection on hybrids: Fisher’s  
791 geometric model explains a variety of empirical patterns. *Evol Lett*. 2018;2(5):472–98.
- 792 53. Rieseberg LH, Archer MA, Wayne RK. Transgressive segregation, adaptation and  
793 speciation. *Heredity*. 1999 Oct;83(4):363–72.
- 794 54. Visscher PM, Haley CS. Detection of putative quantitative trait loci in line crosses under  
795 infinitesimal genetic models. *Theor Appl Genet*. 1996 Oct;93(5–6):691–702.
- 796 55. Pfaff CL, Parra EJ, Bonilla C, Hiester K, McKeigue PM, Kamboh MI, et al. Population  
797 structure in admixed populations: effect of admixture dynamics on the pattern of linkage  
798 disequilibrium. *Am J Hum Genet*. 2001 Jan;68(1):198–207.
- 799 56. Wiens JJ. Widespread loss of sexually selected traits: how the peacock lost its spots. *Trends*  
800 *Ecol Evol*. 2001 Sep 1;16(9):517–23.
- 801 57. Rosenthal GG, Flores Martinez TY, García de León FJ, Ryan MJ. Shared preferences by  
802 predators and females for male ornaments in swordtails. *Am Nat*. 2001 Aug;158(2):146–54.

- 803 58. Achorn AM, Rosenthal GG. It's not about him: mismeasuring 'good genes' in sexual  
804 selection. *Trends Ecol Evol.* 2020 Mar 1;35(3):206–19.
- 805 59. Endler JA. Signals, signal conditions, and the direction of evolution. *The Am Nat.* 1992  
806 Mar 1;139:S125–53.
- 807 60. Rosenthal G. Mate choice: the evolution of sexual decision making from microbes to  
808 humans. Princeton University Press; 648 p.
- 809 61. Kallman KD, Bao IY. Female heterogamety in the swordtail, *Xiphophorus alvarezii* Rosen  
810 (Pisces, Poeciliidae), with comments on a natural polymorphism affecting sword coloration.  
811 *J Exp Zool.* 1987 Jul;243(1):93–102.
- 812 62. Schneider CA, Rasband WS, Eliceiri KW. NIH image to imagej: 25 years of image  
813 analysis. *Nat Methods.* 2012 Jul;9(7):671–5.
- 814 63. Corbett-Detig R, Nielsen R. A Hidden Markov Model approach for simultaneously  
815 estimating local ancestry and admixture time using next generation sequence data in  
816 samples of arbitrary ploidy. *PLOS Genet.* 2017 Jan 3;13(1):e1006529.
- 817 64. Falconer DS. Introduction to quantitative genetics. Oliver & Boyd, Edinburgh & London.;  
818 1960. ix + 365 pp.
- 819 65. Marçais G, Delcher AL, Phillippy AM, Coston R, Salzberg SL, Zimin A. MUMmer4: A  
820 fast and versatile genome alignment system. *PLOS Comput Biol.* 2018 Jan  
821 26;14(1):e1005944.
- 822 66. Krueger F. FelixKrueger/TrimGalore. Available from:  
823 <https://github.com/FelixKrueger/TrimGalore>
- 824 67. Bray NL, Pimentel H, Melsted P, Pachter L. Near-optimal probabilistic RNA-seq  
825 quantification. *Nat Biotechnol.* 2016 May;34(5):525–7.
- 826 68. Love MI, Huber W, Anders S. Moderated estimation of fold change and dispersion for  
827 RNA-seq data with DESeq2. *Genome Biol.* 2014 Dec 5;15(12):550.
- 828 69. Stephens M. False discovery rates: a new deal. *Biostatistics.* 2017 Apr 1;18(2):275–94.
- 829 70. van de Geijn B, McVicker G, Gilad Y, Pritchard JK. WASP: allele-specific software for  
830 robust molecular quantitative trait locus discovery. *Nat Methods.* 2015 Nov;12(11):1061–3.
- 831 71. Luo W, Friedman MS, Shedden K, Hankenson KD, Woolf PJ. GAGE: generally applicable  
832 gene set enrichment for pathway analysis. *BMC Bioinformatics.* 2009;10(1):161.
- 833 72. Schartl M, Walter RB, Shen Y, Garcia T, Catchen J, Amores A, et al. The genome of the  
834 platyfish, *Xiphophorus maculatus*, provides insights into evolutionary adaptation and  
835 several complex traits. *Nat Genet.* 2013 Mar 31;45:567.

- 836 73. Shen Y, Chalopin D, Garcia T, Boswell M, Boswell W, Shiryev SA, et al. *X. couchianus*  
837 and *X. hellerii* genome models provide genomic variation insight among Xiphophorus  
838 species. *BMC Genomics*. 2016 Jan 7;17(1):37.
- 839 74. Schumer M, Cui R, Powell DL, Rosenthal GG, Andolfatto P. Ancient hybridization and  
840 genomic stabilization in a swordtail fish. *Mol Ecol*. 2016 Jun 1;25(11):2661–79.
- 841 75. Yang Z. PAML 4: phylogenetic analysis by maximum likelihood. *Mol Biol Evol*. 2007 Aug  
842 1;24(8):1586–91.
- 843 76. Sievers F, Wilm A, Dineen D, Gibson TJ, Karplus K, Li W, et al. Fast, scalable generation  
844 of high-quality protein multiple sequence alignments using Clustal Omega. *Mol Syst Biol*.  
845 2011 Oct 11;7:539.
- 846 77. Li H, Durbin R. Fast and accurate short read alignment with Burrows-Wheeler transform.  
847 *Bioinformatics*. 2009;25(14).
- 848 78. McKenna A, Hanna M, Banks E, Sivachenko A, Cibulskis K, Kernytsky A, et al. The  
849 Genome Analysis Toolkit: a MapReduce framework for analyzing next-generation DNA  
850 sequencing data. *Genome Res*. 2010 Sep;20(9):1297–303.
- 851 79. Stamatakis A. RAxML-VI-HPC: Maximum likelihood-based phylogenetic analyses with  
852 thousands of taxa and mixed models. *Bioinformatics*. 2006;22(21):2688–90.
- 853  
854



## 855 **Supporting Information Captions**

856 **Fig S1. Sword length by group and QTL effect size estimates.** **A.** Distribution of normalized  
857 sword length phenotypes in F<sub>1</sub> and F<sub>2</sub> hybrids between *X. birchmanni* and *X. malinche* and  
858 within each of these species. These distributions allow us to estimate broad sense heritability for  
859 sword length. **B.** Posterior distribution of ABC simulations to estimate the proportion of  
860 phenotypic variance explained by the sword length QTL on chromosome 13. The red line  
861 indicates the maximum a posteriori estimate of 0.055. This analysis indicates that the  
862 chromosome 13 QTL explains a substantial proportion of the heritable variation in sword length  
863 (~11%) but suggests the presence of other QTL underlying the sword.

864  
865 **Fig S2. Local ancestry along chromosomes 1-12 for an F<sub>2</sub> hybrid individual.**  
866 Plotted here are the number of *X. malinche* alleles at each ancestry informative site supported by  
867 a posterior probability of 0.9 or greater for a given ancestry state. Scale on x-axis corresponds to  
868 the chromosome length in megabases.

869  
870 **Fig S3. Expected individual level accuracy from simulations of early generation hybrids.**  
871 Simulations were conducted using the *mixnmatch* and *ancestryinfer* programs with parameters  
872 matching those observed in our study system. See Supporting Information 1 for more details.

873  
874 **Fig S4. Sword length and sword black margin can become decoupled in hybrids even**  
875 **though the traits are always observed in *X. malinche*.** Top - *X. malinche*. Bottom left - male  
876 hybrid with a short sword lacking upper and lower pigmented margin. Bottom right - male  
877 hybrid with a short sword lacking an upper sword pigmented margin but displaying a lower  
878 sword pigmented margin.

879  
880 **Fig S5. MUMmer alignment of chromosome 13.** This alignment, generated from the *X.*  
881 *birchmanni* and *X. malinche de novo* assemblies, indicates that there are no structural  
882 rearrangements between species in the QTL region. The approximate location of the QTL region  
883 is indicated by the gray box. Red dots indicate co-linear alignments, blue dots indicate inverted  
884 alignments.

885  
886 **Fig S6. Sword length is associated with genome-wide ancestry.** Sword length is associated  
887 with genome-wide ancestry in early generation hybrids between *X. birchmanni* and *X. malinche*  
888 (Spearman's  $\rho = 0.2$ ,  $p < 4 \times 10^{-6}$ ). The correlation between sword length and genome-wide  
889 ancestry remains even after accounting for ancestry on chromosome 13 (Spearman's  $\rho = 0.18$ ,  
890  $p < 4 \times 10^{-5}$ ).

891  
892 **Fig S7. QTL analysis with and without AIC chromosomes included as covariates.**  
893 Thirteen chromosomes were retained in the AIC analysis of the association between  
894 chromosome-level ancestry and sword length. We repeated QTL mapping including ancestry on  
895 each of these chromosomes as covariates, excluding chromosome 13, and confirmed that we still  
896 detect the chromosome 13 QTL in this analysis.

897  
898 **Fig S8. Stages of sword regeneration.** Example of *X. birchmanni* (left), F<sub>1</sub> (middle), and *X.*  
899 *malinche* (right) fish included in the sword regeneration RNAseq experiment. Shown here are

900 phenotypes from fish pre-removal of the edge of the caudal fin (and sword in *X. malinche* and  
901 F<sub>1</sub>s), post-removal, and after tissue regrowth.

902

903 **Fig S9. Heatmap of 30 differentially expressed genes between *X. birchmanni* and *X.***  
904 ***malinche* regenerating tissue with the strongest expression differences between species.**

905 30 out of the 3,333 significantly (FDR adjusted p-value < 0.1) differentially expressed genes are  
906 shown. Many of these genes have intermediate expression in F<sub>1</sub> hybrids. Dark blue, light blue,  
907 and red rectangles under the dendrogram indicate species identity of each biological replicate,  
908 light blue to orange shading in the matrix indicates relative expression level. Color legend to the  
909 right corresponds to log<sub>2</sub> fold changes in expression.

910

911 **Fig S10. Expression of *sp8* in regenerating caudal tissue in *X. malinche* (MM), *X.***  
912 ***birchmanni* (BB), and F<sub>1</sub> hybrids (MB).** Semi-transparent points show normalized counts for  
913 each individual and solid points and whiskers show the mean ± two standard errors of the mean.  
914 The log fold change between *X. birchmanni* and *X. malinche* for *sp8* estimated by DESeq2 was  
915 0.17 (p=0.22).

916

917 **Fig S11. Genome wide ancestry distribution in naturally occurring hybrid populations**  
918 **versus average ancestry within the QTL region (dashed line).**

919 Plotted here is ancestry in 1 Mb windows for the whole genome versus the 1.2 Mb window  
920 overlapping with the chromosome 13 QTL peak. Ancestry in this entire region is not unusual  
921 compared to the null expectations across hybrid populations, however there is substantial  
922 variation in ancestry within the QTL region (see Fig 4).

923

924 **Fig S12. Local phylogeny and inferred ancestry at *sp8* with PhyloNet-HMM. A.** Local  
925 phylogeny of the *sp8* region generated with RAxML with the GTR+GAMMA model. Node  
926 labels show bootstrap support based on 100 rapid bootstraps. **B.** Local ancestry results using  
927 PhyloNet-HMM at *sp8* region (dashed gray lines) indicate that although there is evidence of  
928 introgression from platyfish nearby, there are no introgressed regions from the platyfish clade  
929 that are unique to *X. birchmanni*. *X. malinche* is shown in red, *X. birchmanni* in blue; purple dots  
930 indicate overlap in posterior probability of introgression between the two species.

931

932 **Fig S13. QTL results for three chromosomes with (blue) and without (black) genome-wide**  
933 **ancestry included as a covariate.** Without ancestry included as a covariate (black lines), we  
934 recover three QTLs that pass the genome-wide significance threshold (LOD=4). However, the  
935 peaks on chromosome 1 and chromosome 20 have a relatively flat signal and drop below the  
936 genome-wide significance threshold when we account for genome-wide ancestry in R/qtl  
937 analysis (blue lines).

938

939 **Fig S14. Genome-wide distribution of *X. malinche* ancestry among F<sub>2</sub> hybrids in our**  
940 **mapping population.** Although on average individuals derive 50% of their genome from each  
941 parental species, there is substantial variance in ancestry generated by the recombination process.

942

943 **Fig S15. Results of admix'em simulations evaluating accuracy of heritability estimates**  
944 **varying the level of genetic variation for the trait of interest in parental populations.**

945 **A.** Broad sense heritability of a phenotype as a function of ancestry was varied from 0.2 to 0.6  
946 across simulations. We also varied whether all phenotypic variation was attributable to ancestry  
947 (blue) or whether there was segregating variation for the phenotype within the simulated *X.*  
948 *malinche* population (red). In those simulations we drew allele frequencies for the causal loci in  
949 the *X. malinche* population from a random exponential distribution and arbitrarily set the effect  
950 size to 1% of the simulated QTL effect size. Large points and whiskers show mean and two  
951 standard deviations across 100 simulations, raw data per simulation is shown by individual  
952 points. **B.** In another series of simulations, we varied the effect size of the alleles segregating in  
953 the simulated *X. malinche* population from 3-10% of the QTL effect size (red). Simulations with  
954 no segregating variation in *X. malinche* are shown in blue for comparison. Large points and  
955 whiskers show mean and two standard deviations across 100 simulations, raw data per  
956 simulation is shown by individual points. See Supporting Information 10 for a complete  
957 description of these simulations.

958

959 **Fig S16. Predicted power curve for QTL detection in our study as a function of simulated**  
960 **effect size.** We varied the proportion of phenotypic variation explained by a single QTL and  
961 tested our power to detect it in simulations. Each point represents the proportion of 1,000  
962 simulations in which the QTL was detected at our genome-wide significance threshold.

963

964 **Fig S17. Results of a two-dimensional two-QTL genome scan for sword length.**

965 Data shown above and left of the diagonal compare a full two QTL model allowing for epistatic  
966 interactions to a single QTL model ( $LOD_{fv1}$ ). Results shown below and right of the diagonal  
967 show comparison of a two QTL model, where two single loci on separate chromosomes have  
968 additive effects on the phenotype, to a single QTL model ( $LOD_{av1}$ ). The color indicates the  
969 magnitude of the LOD score. Numbers on the color scale to the right correspond to values of  
970  $LOD_{fv1}$  and  $LOD_{av1}$ , respectively.

971

972 **Fig S18. Schematic showing measurement of sword length using ImageJ software.**

973 Sword extension was normalized by standard length for QTL analysis of sword length.

974

975 **Fig S19. Manhattan plot showing the results of R/qtl analysis for the presence of the lower**  
976 **sword pigmented edge.** Sword length is one of several phenotypes that makes up the composite  
977 sword trait (Fig. S4). The upper sword edge and lower sword edge are also important  
978 components of the trait. No genome-wide significant QTL were identified for the lower sword  
979 edge trait.

980

981 **Fig S20. Expression levels of differentially expressed *hoxa* genes in regenerating caudal fin**  
982 **tissue in *X. malinche* (dark blue),  $F_1$  hybrids (light blue) and *X. birchmanni* (red).**

983 This cluster of genes is found nearby the QTL region we identify on chromosome 13. Solid  
984 points and whiskers show mean and two standard errors of the mean, semi-transparent points  
985 show the raw data per individual.

986

987 **Fig S21. Example of results from simulations of ancient admixture and application of**  
988 **PhyloNet-HMM to infer local ancestry.**

989 Black dots show the posterior probability inferred by PhyloNet-HMM that the site is  
990 hybridization derived. Purple lines above the black dots show the true locations of admixture  
991 derived tracts, determined from decoding tree sequences in SLiM.

992

993 **Fig S22. Comparison of linear model and R/qtl results.** Linear model based mapping results  
994 (right) for sword length mirror results from R/qtl (left). Due to extremely long runtimes it was  
995 impractical to use R/qtl in simulations but these results suggest that a linear model based  
996 approach gives qualitatively similar results.

997

998 **Fig S23. Distribution of median p-values in simulations of polygenic traits determined by**  
999 **ancestry at 50 underlying loci.** **A.** Distribution of median p-values at ancestry informative sites  
1000 in each of 100 simulations when genome-wide ancestry is not included as a covariate in the  
1001 analysis. **B.** Distribution of median p-values at ancestry informative sites in each of 100  
1002 simulations when genome-wide ancestry is included as a covariate in the analysis. Red dashed  
1003 line indicates the median of each distribution. P-values are skewed towards lower values in **A**.  
1004 This may reflect lower power when genome-wide ancestry is included as a covariate, or reflect  
1005 the impacts of uncorrected ancestry structure on p-value distributions.

1006

1007 **Fig S24. Example results for simulations of 50 loci contributing to variation in a polygenic**  
1008 **trait.** **A.** Manhattan plot showing results without genome-wide ancestry included as a covariate.  
1009 **B.** Manhattan plot showing results for the same simulation with genome-wide ancestry included  
1010 as a covariate. Because we should not have power to detect individual QTL in these simulations,  
1011 the results in **A** reflect possible inflation of associations when genome-wide ancestry is not  
1012 accounted for. Red line shows genome-wide significance threshold used in our study.

1013

1014 **Fig S25. Distribution of median p-values in simulations of polygenic traits determined by**  
1015 **ancestry at 500 underlying loci.** **A.** Distribution of median p-values at ancestry informative  
1016 sites in each of 100 simulations when genome-wide ancestry is not included as a covariate in the  
1017 analysis. **B.** Distribution of median p-values at ancestry informative sites in each of 100  
1018 simulations when genome-wide ancestry is included as a covariate in the analysis. Red dashed  
1019 line indicates the median of each distribution. P-values are significantly shifted towards lower  
1020 values in **A**. Given that we should have near zero power to detect loci of these effect sizes in our  
1021 simulations, this skew likely reflects the impacts of uncorrected ancestry structure on p-value  
1022 distributions.

1023

1024 **Fig S26. Example results for simulations of 500 loci contributing to variation in a polygenic**  
1025 **trait.**

1026 **A.** Manhattan plot showing results without genome-wide ancestry included as a covariate. **B.**  
1027 Manhattan plot for the same simulation showing results with genome-wide ancestry included as  
1028 a covariate. Because we should not have power to detect individual QTL in these simulations,  
1029 the results in **A** reflect possible inflation of associations when genome-wide ancestry is not  
1030 accounted for. Red line shows genome-wide significance threshold used in our study.

1031

1032 **Fig S27. Distribution of average crossover number across 24 chromosomes in the lab-**  
1033 **generated hybrids used in this study.** The mean number of crossovers per chromosome in this

1034 dataset was 1.3, similar to observed values in F<sub>2</sub> hybrids (1.2), suggesting that the majority of  
1035 individuals included in our mapping population were F<sub>2</sub> hybrids.

1036

1037 **Fig S28. Manhattan plot of R/qtl mapping results for sword length excluding F<sub>3</sub> or later**  
1038 **individuals.** Individuals that are likely F<sub>3</sub> hybrids given the number of observed crossover events  
1039 (Fig S27) were excluded from this analysis. Red line indicates genome-wide significant  
1040 threshold determined by permutation.

1041

1042 **Table S1. Genes differentially expressed in regenerated sword tissue.** Information on 3,333  
1043 significantly differentially expressed genes between *X. birchmanni* and *X. malinche* in the  
1044 regenerating caudal fin.

1045

1046 **Table S2. All genes that overlap with the joint QTL region.** Genes that fall within the joint  
1047 QTL interval identified on chromosome 13.

1048

1049 **Table S3. Summary of expression, annotation, and substitution evidence for candidate**  
1050 **genes in the QTL interval.** Evidence associated with the strongest candidates within the QTL  
1051 region on chromosome 13, those associated with fin or limb phenotypes, growth, skeletal or  
1052 muscle phenotypes.

1053

1054 **Table S4. Summary of evolutionary analyses for top candidates.** SIFT, joint ancestry, and  
1055 dN/dS analysis at other candidate genes identified in the chromosome 13 QTL region. Joint  
1056 ancestry analysis was conducted using four hybrid populations and comparing observed *X.*  
1057 *malinche* ancestry across populations to that expected from randomly sampling windows for  
1058 each population.

1059

1060 **Table S5. Summary of ancestry change analyses for top candidates.** Ancestry changes at  
1061 other candidate genes identified in the chromosome 13 QTL interval over time in Acuapa time  
1062 series data.

1063

1064 **Table S6. Read information for RNAseq analysis.** Number of reads collected per individual  
1065 included in RNAseq-based analysis of sword regeneration.

1066

1067 **Table S7. SRA accessions for previously published datasets used in phylogenetic analysis.**  
1068 Average per basepair coverage when mapped to the *X. birchmanni* reference genome is listed.

1069

1070 **Table S8. KEGG pathway enrichment in significantly differentially expressed genes**  
1071 **between *X. malinche* vs *X. birchmanni* regenerating fin tissue.** Only two pathways were  
1072 enriched for higher expression in *X. birchmanni*, suggesting that either *X. birchmanni*  
1073 upregulates or *X. malinche* downregulates (or has constitutively lower expression) of genes  
1074 involved in ECM-receptor interaction and focal adhesion. This analysis included all genes at  
1075 FDR adjusted p-value < 0.1.

1076

1077 **Table S9. Overrepresented Gene Ontology terms in the significantly differentially**  
1078 **expressed genes between *X. malinche* vs *X. birchmanni* regenerating fin tissue.** Of 3368 GO

1079 terms tested, 216 terms were found to be significantly overrepresented with a p-value < 0.05.  
1080 This analysis included all genes at FDR adjusted p-value < 0.1.  
1081  
1082 **Supporting Information text 1.** Expected accuracy of local ancestry inference  
1083  
1084 **Supporting Information text 2.** Narrowing the QTL interval  
1085  
1086 **Supporting Information text 3.** Effect size of the chromosome 13 QTL and expected power  
1087  
1088 **Supporting Information text 4.** Trait independence in hybrids  
1089  
1090 **Supporting Information text 5.** Gene expression analysis of regenerating sword tissue  
1091  
1092 **Supporting Information text 6.** Inference of selection on *sp8* region in time transect data  
1093  
1094 **Supporting Information text 7.** Power to detect introgression with PhyloNet-HMM  
1095  
1096 **Supporting Information text 8.** Simulations of polygenic traits and QTL analysis  
1097  
1098 **Supporting Information text 9.** Evaluating possible complexity introduced by the cross design  
1099  
1100 **Supporting Information text 10.** Investigating impacts of genetic variation within *X. malinche*  
1101 on heritability estimates  
1102
